# Supplementary material for: Protein microarray analysis reveals BAFF-binding autoantibodies in systemic lupus erythematosus
Source: JCI journal article supplement (doi:10.1172/jci70231), 2013-11-24
Supplement: sd1 [file 1]

## SUPPLEMENTAL MATERIAL

### **Protein microarray analysis reveals BAFF-binding autoantibodies in systemic lupus erythematosus**

Jordan V. Price<sup>1,2,10</sup>, David J. Haddon<sup>1,2</sup>, Dodge Kemmer<sup>1,2</sup>, Guillaume Delepine<sup>1,2</sup>, Gil Mandelbaum<sup>1,2</sup>, Justin A. Jarrell<sup>1,2</sup>, Rohit Gupta<sup>1,2</sup>, Imelda Balboni<sup>3</sup>, Eliza F. Chakravarty<sup>4</sup>, Jeremy Sokolove<sup>1,5</sup>, Anthony K. Shum<sup>6</sup>, Mark S. Anderson<sup>7</sup>, Mickie H. Cheng<sup>7</sup>, William H. Robinson<sup>1,5</sup>, Sarah K. Browne<sup>8</sup>, Steven M. Holland<sup>8</sup>, Emily C. Baechler<sup>9</sup>, and Paul J. Utz<sup>1,2,10</sup>

<sup>1</sup>Department of Medicine, Division of Immunology and Rheumatology, Stanford University School of Medicine, Stanford, California 94305; <sup>2</sup> Institute for Immunity, Transplantation and Infection (ITI), Stanford University School of Medicine, Stanford, California 94305; <sup>3</sup>Department of Pediatrics, Division of Allergy, Immunology and Rheumatology, Stanford University School of Medicine, Stanford, California 94305; <sup>4</sup>Arthritis and Clinical Immunology, Oklahoma Medical Research Foundation, Oklahoma City, Oklahoma 73104; <sup>5</sup>VA Palo Alto Health Care System, Palo Alto California 94304; <sup>6</sup>Department of Medicine, Division of Pulmonary and Critical Care, University of California, San Francisco, CA 94143; <sup>7</sup>Diabetes Center, Department of Medicine, Division of Endocrinology and Metabolism, University of California at San Francisco, San Francisco, California 94143; <sup>8</sup>Laboratory of Clinical Infectious Diseases, National Institute of Allergy and Infectious Diseases, National Institutes of Health, Bethesda, Maryland 20892; <sup>9</sup>Center for Immunology, University of Minnesota Medical School, Minneapolis, Minnesota 55455; <sup>10</sup>To whom correspondence should be addressed

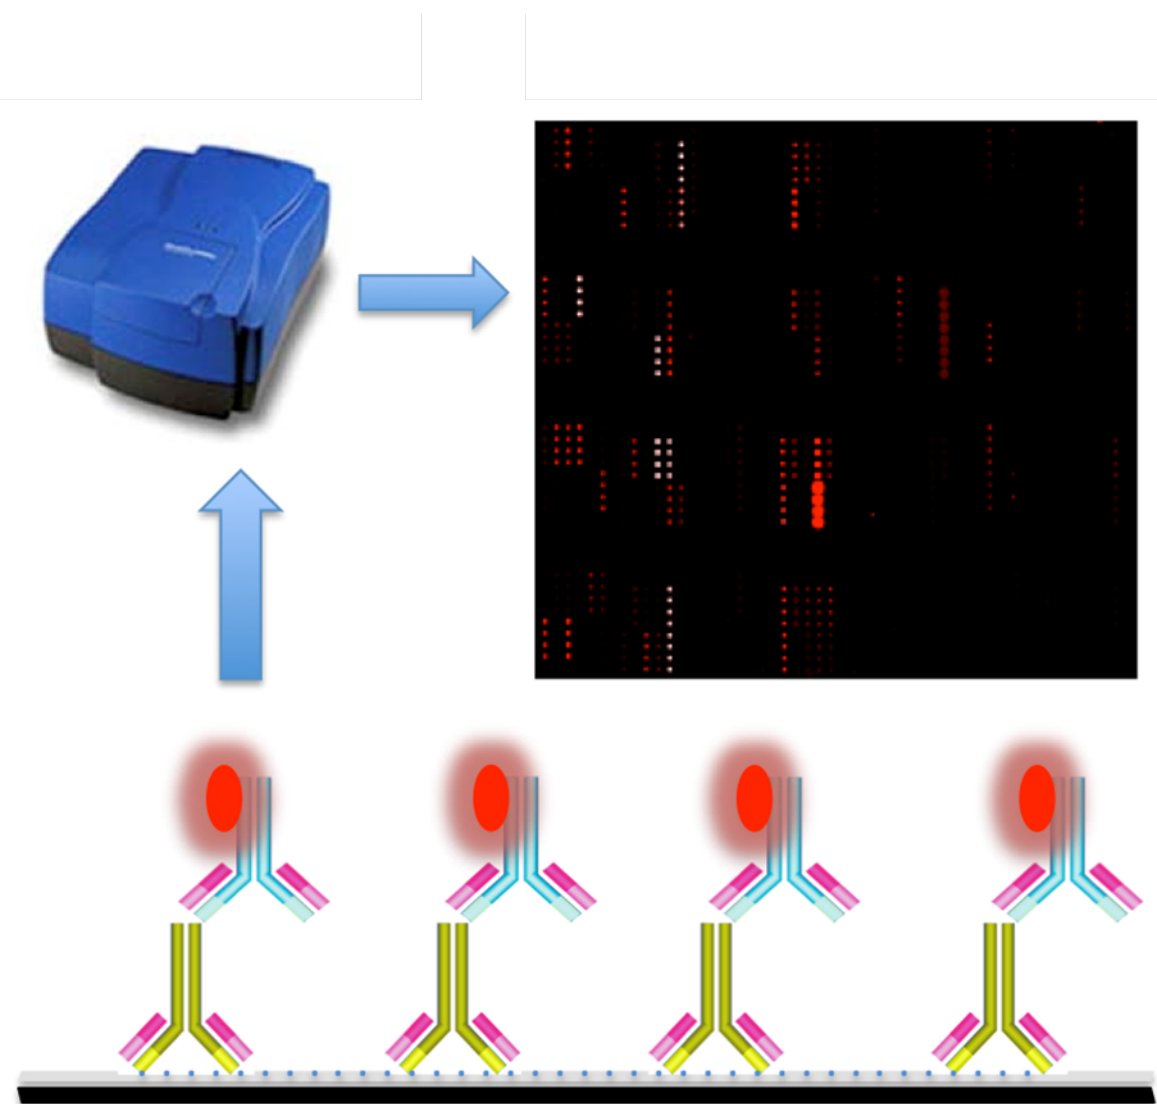

**Supplementary Figure 1. Schematic of the array assay.** We printed protein antigens onto glass microscope slides coated with a layer of nitrocellulose using a robotic microarrayer. To process arrays, we incubated printed slides with sample containing antibodies from commercial sources or derived from human samples. To identify array features bound by antibodies in the sample, we incubated the arrays with fluorescently conjugated secondary antibody specific for the Fc region of the primary antibody probe. To visualize reactive features, we scanned processed arrays using an Axon™ digital microarray scanning system, and quantified median fluorescence intensity (MFI) as a measure of primary antibody reactivity.

**A**

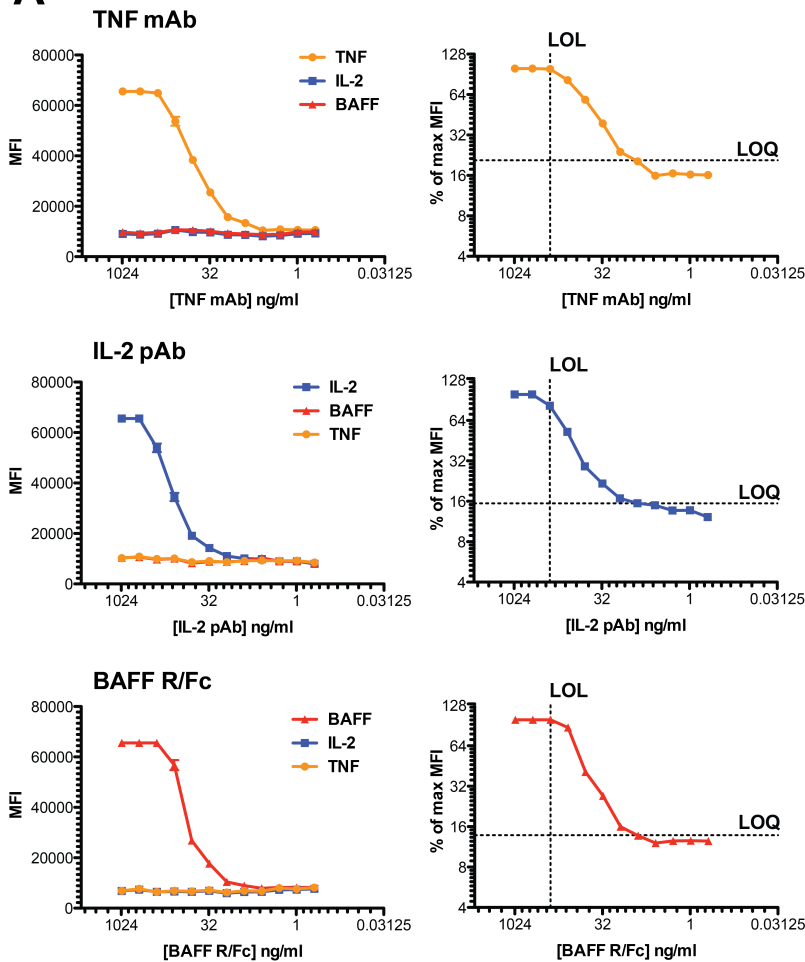

**B**

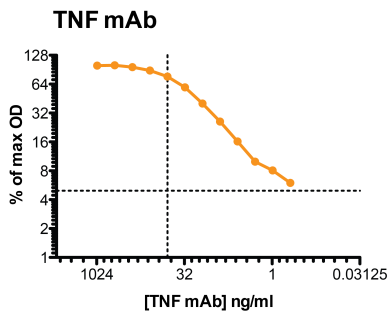

| TNF mAb array | MFI     | [TNF mAb] ng/ml |
|---------------|---------|-----------------|
| LOB           | 11017.5 | —               |
| LOD           | 11925.8 | —               |
| LOQ           | 13582.3 | 8.1             |
| LOL           | 64915.9 | 250             |

log(dynamic range) = 1.49

| TNF mAb ELISA | OD    | [TNF mAb] ng/ml |
|---------------|-------|-----------------|
| LOB           | 0.061 | —               |
| LOD           | 0.064 | —               |
| LOQ           | 0.067 | below 0.49      |
| LOL           | 0.86  | 62.5            |

log(dynamic range) = 2.11

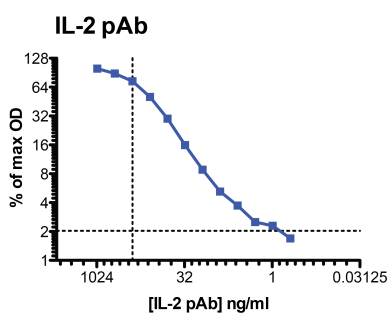

| IL-2 pAb array | MFI     | [IL-2 pAb] ng/ml |
|----------------|---------|------------------|
| LOB            | 8869.2  | —                |
| LOD            | 9307.3  | —                |
| LOQ            | 10106.4 | 11.4             |
| LOL            | 53934.0 | 250              |

log(dynamic range) = 1.34

| IL-2 pAb ELISA | OD    | [IL-2 pAb] ng/ml |
|----------------|-------|------------------|
| LOB            | 0.059 | —                |
| LOD            | 0.060 | —                |
| LOQ            | 0.062 | 0.82             |
| LOL            | 2.24  | 250              |

log(dynamic range) = 2.48

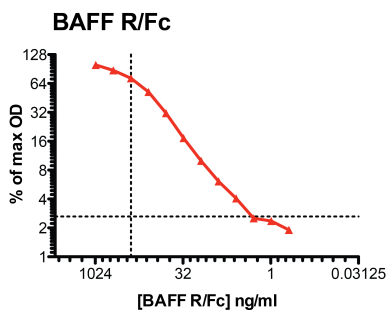

| BAFF R/Fc array | MFI    | [BAFF R/Fc] ng/ml |
|-----------------|--------|-------------------|
| LOB             | 7396.1 | —                 |
| LOD             | 7980.7 | —                 |
| LOQ             | 9046.9 | 35.4              |
| LOL             | 65535  | 250               |

log(dynamic range) = 0.85

| BAFF R/Fc ELISA | OD    | [BAFF R/Fc] ng/ml |
|-----------------|-------|-------------------|
| LOB             | 0.063 | —                 |
| LOD             | 0.066 | —                 |
| LOQ             | 0.070 | 1.70              |
| LOL             | 1.94  | 250               |

log(dynamic range) = 2.17

**Supplementary Figure 2. Serum factor array dynamic range of detection for mAb, pAb and**

**R/Fc probes and comparison with ELISA.**

**(A)** Graphs displaying array signal (MFI) of a two-fold dilution of TNF mAb, IL-2 pAb and BAFF R/Fc probes ranging from 1000ng/ml – 0.49ng/ml and including a 0ng/ml “blank” control. RAW MFI (linear scale) is shown plotted against [probe] on a  $\log_2$  scale (left panels), and as %of max MFI vs. [probe] on a  $\log_2$  scale (right panels). LOL, limit of linearity; LOQ, limit of quantitation (see materials and methods for details). **(B)** Graphs displaying ELISA signal measured for the same 2-fold serial dilution of TNF mAb, IL-2 pAb and BAFF R/Fc probes shown in A, and table (left) displaying a summary of the array and ELISA measurements used to calculate the dynamic range of detection for each probe in each system. LOB, limit of blank; LOD, limit of detection; LOQ, limit of quantitation; LOL, limit of linearity (see materials and methods for details). Error bars represent mean  $\pm$  s.e.m. of 24 replicate array feature MFI or 4 replicate ELISA well OD measurements for each [probe].

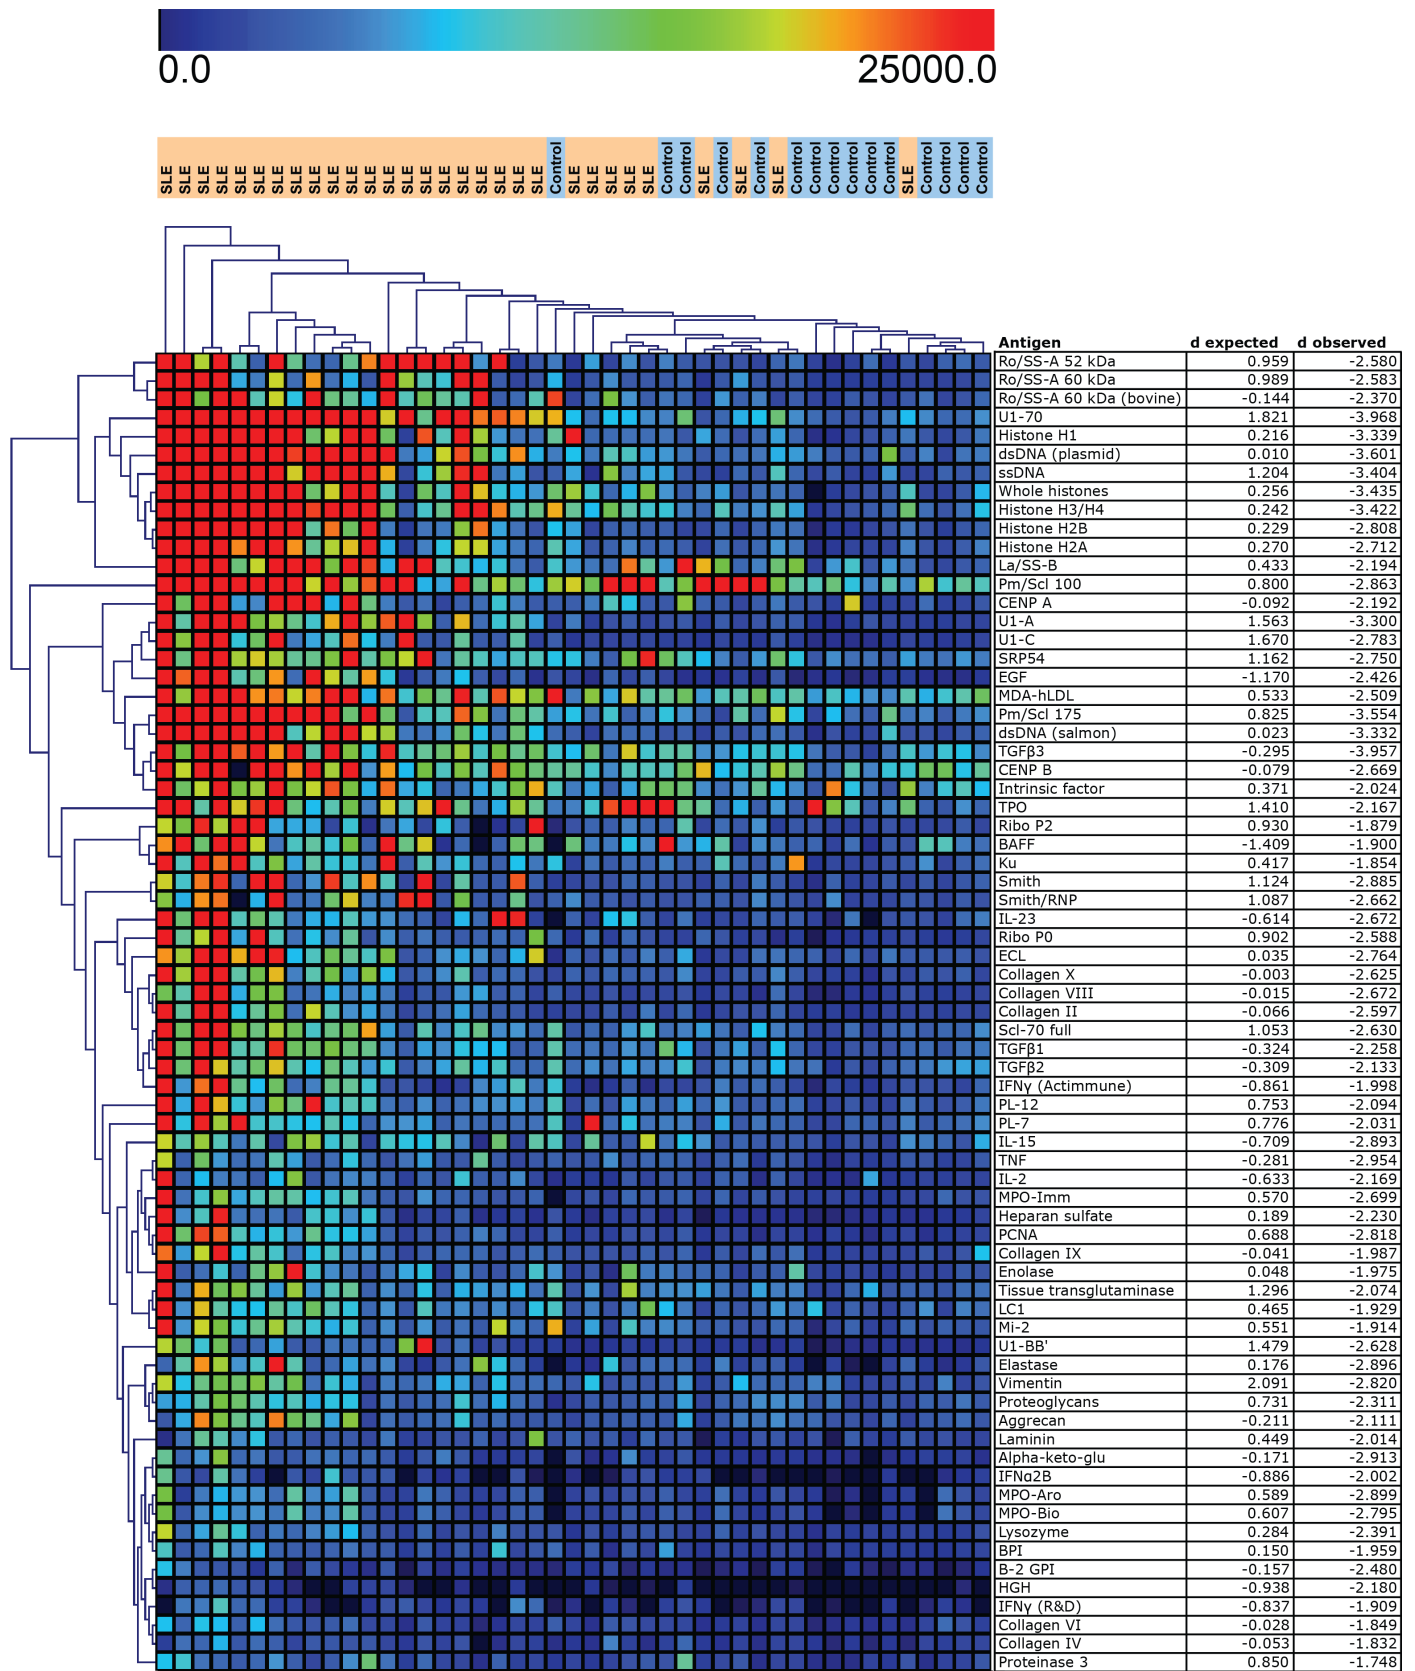

**Supplementary Figure 3. SAM algorithm-generated t statistics (d-scores) for indicated array features presented in Figure 2.** Heatmap from Figure 2 displaying antigens identified to be significantly associated with SLE vs. control samples,  $q < 0.001$ , with associated d scores generated by the SAM algorithm.

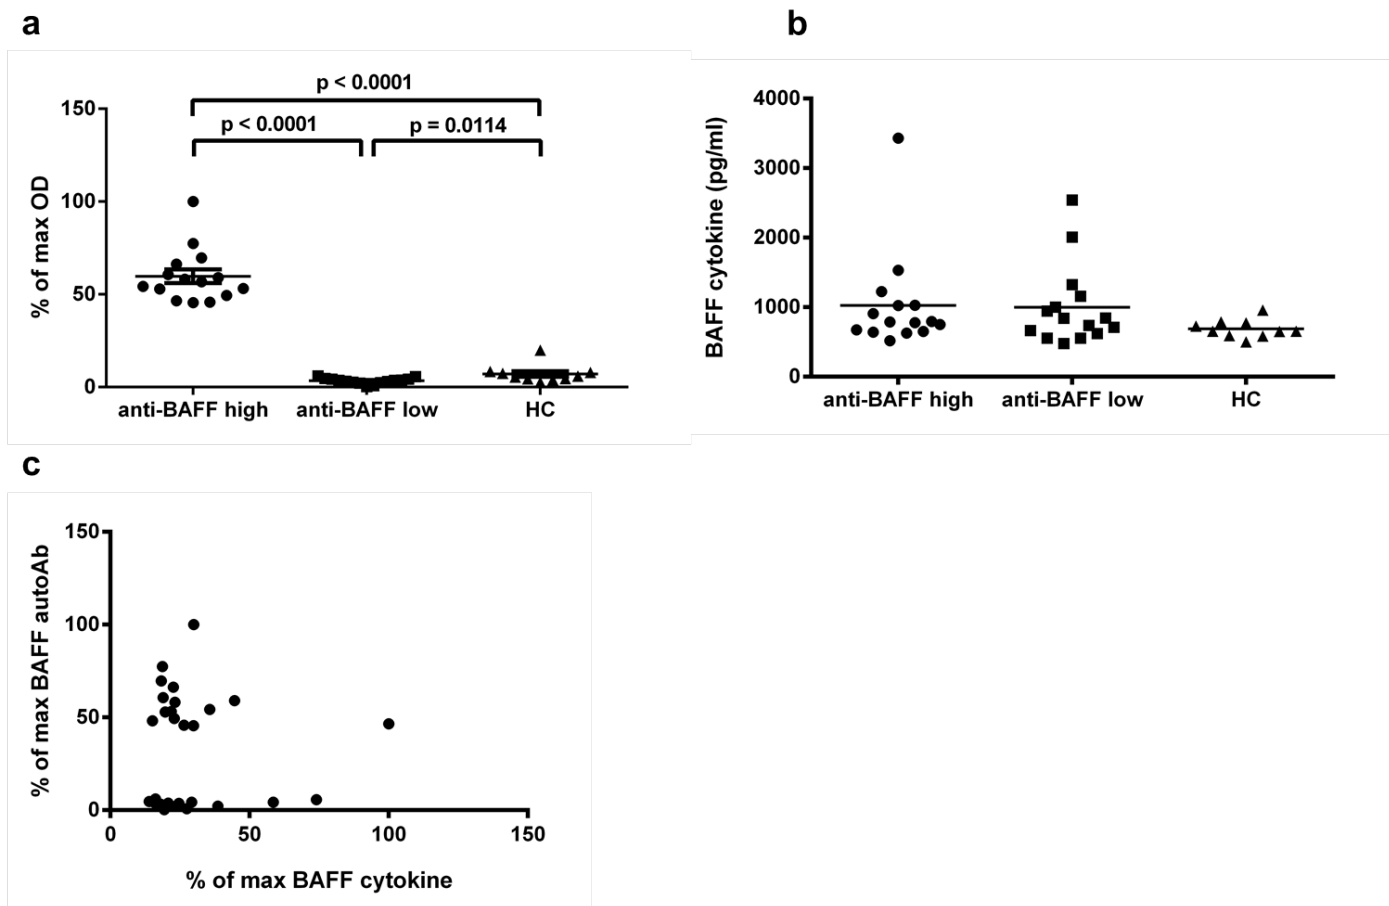

**Supplementary Figure 4. Anti-BAFF autoantibody levels and serum BAFF levels in 40 samples from the Stanford Chronic Immunologic Diseases Registry and Repository.** (A)

Graph displaying level of BAFF-binding IgG autoantibodies in 40 SCIDRR cohort samples as measured by ELISA, stratified by highest and lowest level of BAFF reactivity. P values (two-tailed) were calculated using a Mann-Whitney U test to compare OD values in the different sample groups. Error bars represent mean  $\pm$  s.e.m. of sample group OD values. (B) Level of serum BAFF protein in samples depicted in **a** as measured by sandwich ELISA (R&D). Levels of serum BAFF in all three categories were not observed to differ significantly. (C) Relationship of BAFF-binding autoantibodies and level of serum BAFF in 40 Registry samples.

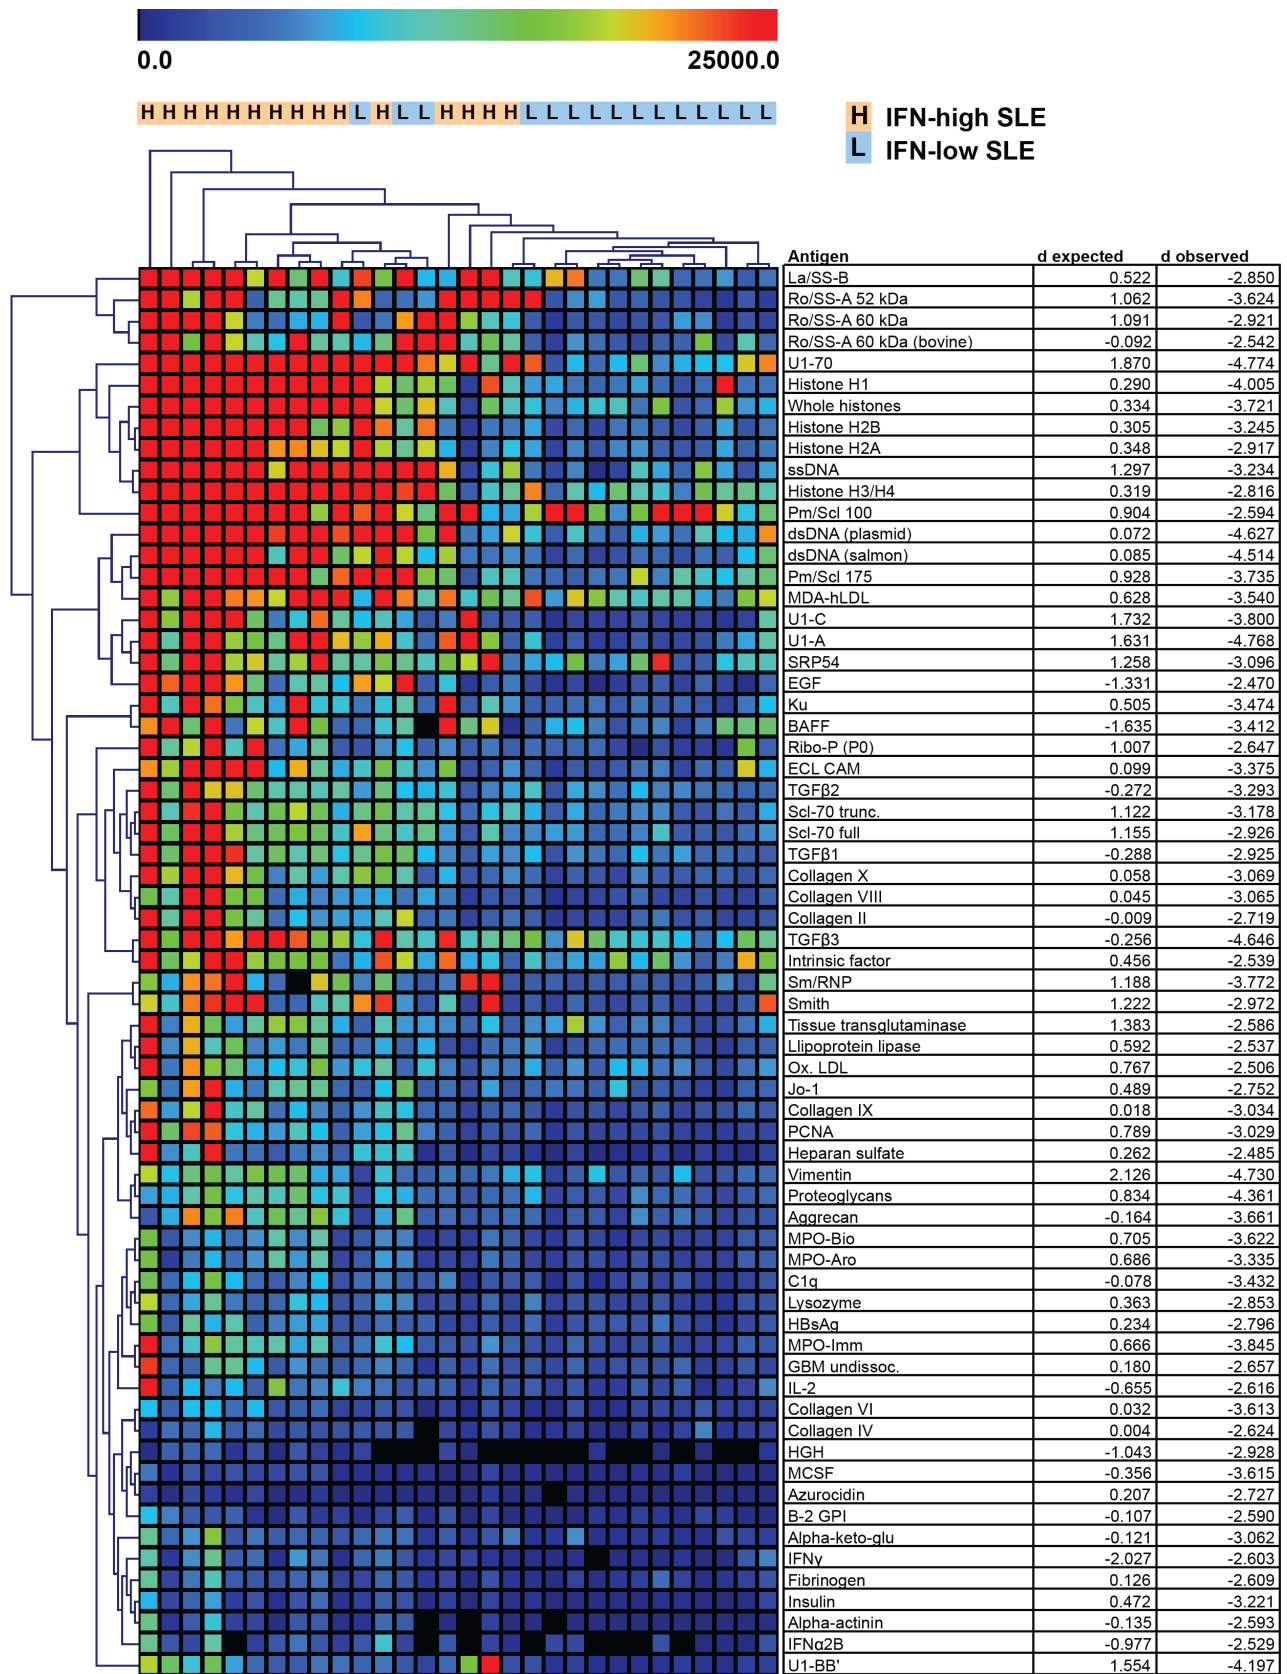

**Supplementary Figure 5. Serum factor array analysis of autoantibody reactivity in IFN-high and IFN-low SLE samples.** Heatmap displaying serum IgG reactivity significantly associated with IFN-high (beige) SLE disease state vs. IFN-low (blue) SLE disease state  $q < 0.001$ , with associated d scores generated by the SAM algorithm.

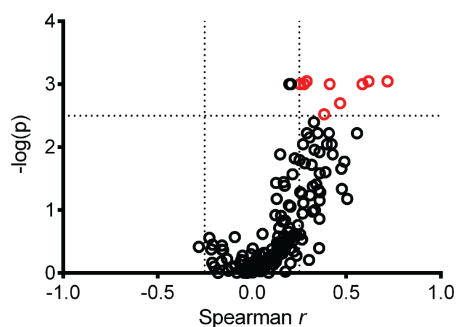

| Protein                    | Spearman <i>r</i> | p value | q value |
|----------------------------|-------------------|---------|---------|
| ICAM-3                     | 0.718             | <0.001  | 0.035   |
| MIP-1 $\alpha$ (CCL3)      | 0.618             | <0.001  | 0.035   |
| Lymphotoxin (TNF $\beta$ ) | 0.288             | <0.001  | 0.035   |
| ALCAM                      | 0.253             | 0.001   | 0.017   |
| Amphiregulin               | 0.274             | 0.001   | 0.017   |
| Neurotrophin-4             | 0.411             | 0.001   | 0.017   |
| TIMP-1                     | 0.586             | 0.001   | 0.017   |
| IL-2                       | 0.467             | 0.002   | 0.033   |
| IL-1 $\beta$               | 0.381             | 0.003   | 0.044   |

**Figure 6. BAFF reactivity correlates with measurements of serum proteins associated with more severe SLE in the ABCoN cohort.** Plot displaying measurements of serum proteins associated with BAFF reactivity in the ABCoN cohort. A Spearman *r* correlation coefficient was generated to test the relationship of each serum protein with BAFF reactivity, and false discovery rate (*q* value) was determined using the Benjamini and Hochberg method to correct for multiple hypothesis testing. Dashed lines correspond to Spearman *r* (>0.25,<0.25; x-axis), and a significance level of *q*<0.05 (*p*<0.001; y-axis). Features meeting these criteria are shown in red and listed in the table, right. See **Supplementary Table 3** for correlation statistics for all serum proteins tested.



**Supplementary Table 1. Serum factor microarray antigens**

**Serum Factor Antigens**

| <b>Name</b> | <b>Vendor</b> | <b>Item/Catalog #</b> | <b>Notes/other info</b>                                          |
|-------------|---------------|-----------------------|------------------------------------------------------------------|
| April       | R&D           | 884-AP-010            | TNFSF13                                                          |
| BAFF        | R&D           | 2149-BF-010           | B cell activation factor of the TNF family (BLyS/TNFSF13B)       |
| BDNF        | Humanzyme     | HZ-6501               | Brain-derived neurotrophic factor                                |
| BMP4        | Humanzyme     | HZ-1046               | Bone morphogenic protein 4                                       |
| BNP         | Humanzyme     | HZ-6502               | Brain natriuretic peptide                                        |
| C1q         | Biodesign     | A90150H               | Complement C1q protein, from human serum                         |
| EGF         | Humanzyme     | HZ-6504               | Epidermal growth factor                                          |
| EPO         | Humanzyme     | HZ-1021               | Erythropoietin                                                   |
| FGF-basic   | R&D           | 233-FB                | Basic fibroblast growth factor (bFGF, FGF2)                      |
| Flt3L       | Humanzyme     | HZ-1034               | Fms-related tyrosine kinase 3 ligand                             |
| GCSF        | Humanzyme     | HZ-1050               | Granulocyte colony-stimulating factor                            |
| GMCSF       | Humanzyme     | HZ-1002               | Granulocyte-macrophage colony-stimulating factor                 |
| HGF         | Humanzyme     | HZ-1054               | Hepatocyte growth factor                                         |
| HGH         | Humanzyme     | HZ-1006               | Human growth hormone                                             |
| IFNa2A      | Humanzyme     | HZ-1064               | Interferon alpha 2A                                              |
| IFNa2A      | PBL           | 111000-1              | Interferon alpha 2A                                              |
| IFNa2A      | eBioscience   | -                     | Interferon alpha 2A                                              |
| IFNa2B      | Humanzyme     | HZ-1070               | Interferon alpha 2B                                              |
| IFNg        | Actimmune     | -                     | Interferon gamma (injectable drug)                               |
| IFNg        | R&D           | 285IF                 | Interferon gamma                                                 |
| IFNg        | eBioscience   | BMS303                | Interferon gamma                                                 |
| IFNomega    | Peptotech     | 300-02J               | Interferon Omega                                                 |
| IL-1B       | eBioscience   | 14-8018-62            | Interleukin 1 beta                                               |
| IL-2        | Humanzyme     | HZ-1015               | Interleukin 2                                                    |
| IL-3        | Humanzyme     | HZ-1073               | Interleukin 3                                                    |
| IL-3        | Peptotech     | 200-03                | Interleukin 3                                                    |
| IL-4        | Humanzyme     | HZ-1052               | Interleukin 4                                                    |
| IL-5        | R&D           | 205-IL                | Interleukin 5                                                    |
| IL-6        | eBioscience   | 14-8069-62            | Interleukin 6                                                    |
| IL-6        | Humanzyme     | HZ-1058               | Interleukin 6                                                    |
| IL-6        | Peptotech     | 200-06                | Interleukin 6                                                    |
| IL-7        | R&D           | 207-IL                | Interleukin 7                                                    |
| IL-8        | R&D           | 208-IL                | Interleukin 8 (CXCL8)                                            |
| IL-8        | eBioscience   | 14-8089-63            | Interleukin 8 (CXCL8)                                            |
| IL-9        | eBioscience   | 14-8958-62            | Interleukin 9                                                    |
| IL-9        | R&D           | 209-IL-010            | Interleukin 9                                                    |
| IL-10       | Humanzyme     | HZ-1145               | Interleukin 10                                                   |
| IL-11       | Humanzyme     | HZ-6520               | Interleukin 11                                                   |
| IL-12       | Humanzyme     | HZ-1256               | Interleukin 12                                                   |
| IL-12 p70   | eBioscience   | 14-8129-62            | Interleukin 12 - p70 subunit                                     |
| IL-13       | Peptotech     | 200-13                | Interleukin 13                                                   |
| IL-15       | Humanzyme     | HZ-6522               | Interleukin 15                                                   |
| IL-17A      | Humanzyme     | HZ-1112               | Interleukin 17A                                                  |
| IL-17E      | R&D           | 1258-IL-025           | Interleukin 17E, IL-25                                           |
| IL-17F      | HZ            | HZ-1116               | Interleukin 17F                                                  |
| IL-22       | PT            | 200-22                | Interleukin 22                                                   |
| IL-23       | Humanzyme     | HZ-1048               | Interleukin 23                                                   |
| MCP1        | R&D           | 279-MC                | Monocyte chemotactic protein-1 (CCL2)                            |
| MCP1        | eBioscience   | 14-8398-62            | Monocyte chemotactic protein-1 (CCL2)                            |
| MCSF        | Humanzyme     | HZ-1059               | Macrophage colony-stimulating factor                             |
| NOG         | Humanzyme     | HZ-1037               | Noggin                                                           |
| OSM         | Humanzyme     | HZ-1060               | Oncostatin M                                                     |
| SCF         | Humanzyme     | HZ-1061               | Stem cell factor                                                 |
| TGFB1       | Humanzyme     | HZ-1011               | Transforming growth factor beta 1                                |
| TGFB2       | Humanzyme     | HZ-1041               | Transforming growth factor beta 2                                |
| TGFB3       | Humanzyme     | HZ1089                | Transforming growth factor beta 3                                |
| TNF         | Humanzyme     | HZ-1014               | Tumor necrosis factor                                            |
| TPO - pepro | Peptotech     | 300-18                | Thrombopoietin                                                   |
| TSLP        | R&D           | 1398-TS-010           | Thymic stromal lymphopoietin                                     |
| VEGF 121    | Humanzyme     | HZ-1063               | Vascular endothelial growth factor 121 amino acid splice variant |
| VEGF 165    | Humanzyme     | HZ-1062               | Vascular endothelial growth factor 165 amino acid splice variant |

SLE array only

APS-1/DMAC array only

**Autoimmune Disease Tissue Antigens**

| Name                   | Vendor                  | Item/Catalog # | Notes/other info                                                                                                |
|------------------------|-------------------------|----------------|-----------------------------------------------------------------------------------------------------------------|
| Actin                  | Sigma                   | A2522          | From rabbit muscle                                                                                              |
| Aggrecan               | Sigma                   | A1960          | From bovine articular cartilage                                                                                 |
| Aldolase               | Sigma                   | A2714          | From rabbit muscle                                                                                              |
| Alpha-actinin          | Sigma                   | A9776          | From chicken gizzard                                                                                            |
| Alpha-keto-glu         | Sigma                   | K1502          | Alpha-Ketoglutarate dehydrogenase, from porcine heart                                                           |
| Annexin                | Sigma                   | A9450          | From human placenta                                                                                             |
| Azurocidin             | The Binding Site/Arotec | ATA01-02       | From human neutrophils                                                                                          |
| B-2 GPI                | Diarect                 | 14901          | Beta-2 glycoprotein 1 (Apolipoprotein H), recombinant human                                                     |
| BCOADC-E2              | SurModics               | A17701         | E2 component of the branched chain 2-oxo-acid dehydrogenase complex, recombinant human                          |
| BPI                    | The Binding Site/Arotec | ATB01-02       | Bactericidal/permeability increasing protein, from human neutrophils                                            |
| Cardiolipin            | Sigma                   | C0563          | From bovine heart                                                                                               |
| Cardiolipin            | Sigma                   | C1649          | From bovine heart                                                                                               |
| CENP A                 | Diarect                 | 16901          | Recombinant human                                                                                               |
| CENP B                 | Diarect                 | 12501          | Recombinant human                                                                                               |
| Collagen II            | Sigma                   | C1188          | Bornstein and Traub Type II collagen, from bovine tracheal cartilage                                            |
| Collagen IV            | Sigma                   | C7521          | Bornstein and Traub Type IV collagen, from human placenta                                                       |
| Collagen IX            | Sigma                   | C3657          | Bornstein and Traub Type V collagen, from human placenta                                                        |
| Collagen VI            | Sigma                   | C8374          | Bornstein and Traub Type IV, Sigma Type VI, from human placenta                                                 |
| Collagen VIII          | Sigma                   | C7774          | Bornstein and Traub Type I, Sigma Type VIII, from human placenta                                                |
| Collagen X             | Sigma                   | C4407          | Bornstein and Traub Type III, Sigma Type X, from human placenta                                                 |
| dsDNA (plasmid)        | Diarect                 | 12301          | Double-stranded DNA 3.4 kb plasmid, from E. coli                                                                |
| dsDNA (salmon)         | Sigma                   | D1626          | Double-stranded DNA, from salmon                                                                                |
| EBNA-1                 | Sigma Genosys           | Custom         | Epstein-Barr nuclear antigen 1 (aa 398-412, sequence PPPGRRPFFHPVGEA)                                           |
| EBV EA-D               | Biodesign               | R18740         | Epstein-Barr early antigen D, recombinant                                                                       |
| EBV VCA                | Biodesign               | 8180           | Epstein-Barr viral capsid antigen (VCA) gp125, from Burkitt's lymphoma cells                                    |
| EBV-NA-1               | Biodesign               | R57523         | Epstein-Barr nuclear antigen 1, recombinant                                                                     |
| ECL CAM                | US Biological           | E0275          | Enterochromaffin-like cells (ECL) cell attachment matrix                                                        |
| Elastase               | The Binding Site/Arotec | ATE-01         | From human neutrophils                                                                                          |
| Enolase                | Sigma                   | E0379          | From rabbit muscle                                                                                              |
| Fibrinogen 1-S         | Sigma                   | F8630          | Type I-S, from bovine plasma                                                                                    |
| Fibrinogen I           | Sigma                   | F4129          | Factor 1, from human plasma                                                                                     |
| Fibrinogen IV          | Sigma                   | F4753          | Type IV, from bovine plasma                                                                                     |
| GBM-dissoc             | Diarect                 | 16801          | Glomerular basement membrane, dissociated, human alpha-3 chain of collagen IV, recombinant human                |
| GBM-undissoc           | Diarect                 | 15901          | Glomerular basement membrane, undissociated, human alpha-3 chain of collagen IV, recombinant human              |
| Gpr78                  | Assay Designs/Stressgen | SPP-765F       | Immunoglobulin heavy chain binding protein (BiP), recombinant hamster                                           |
| HBsAg                  | Meridian Life Sciences  | R36100         | Hepatitis B virus surface antigen, from human plasma                                                            |
| Heparin                | Sigma                   | H4784-250MG    | Heparin sulfate sodium salt, from porcine intestinal mucosa                                                     |
| HDL                    | Academy Bio-medical     | 80P-HD101      | Human high density lipoprotein                                                                                  |
| Histone H1             | Immunovision            | His-1001       | Histone H1, from bovine tissue                                                                                  |
| Histone H2a            | Immunovision            | His-1002       | Histone H1, from bovine thymus                                                                                  |
| Histone H2b            | Immunovision            | His-1003       | Histone H2b, from bovine tissue                                                                                 |
| Histone H3/H4          | Immunovision            | His-1004       | Histone H3 and H4, from bovine tissue                                                                           |
| Whole histones         | Immunovision            | His-1000       | Whole histones, from chicken red blood cells                                                                    |
| Hsp25                  | Assay Designs/Stressgen | NSP-510F       | Heat shock protein 25kDa, recombinant murine                                                                    |
| Hsp47                  | Assay Designs/Stressgen | SPP-535F       | Heat shock protein 47kDa (colliglin), recombinant human                                                         |
| Hsp60                  | Assay Designs/Stressgen | NSP-540        | Heat shock protein 60kDa, recombinant human                                                                     |
| Hsp70                  | Assay Designs/Stressgen | NSP-555        | Heat shock protein 70kDa, recombinant human                                                                     |
| Hsp90                  | Assay Designs/Stressgen | NSP-770        | Heat shock protein 90kDa, recombinant human                                                                     |
| IF                     | Diarect                 | 16701          | Intrinsic factor, recombinant human                                                                             |
| Insulin                | Sigma                   | I0908          | Recombinant human                                                                                               |
| Jo-1                   | Diarect                 | 12900          | Histidyl-tRNA synthetase, recombinant human                                                                     |
| Ku                     | Diarect                 | 17300          | p70/p80, recombinant human                                                                                      |
| La/SS-B                | Diarect                 | 12800          | Recombinant human                                                                                               |
| Laminin                | Sigma                   | L2020          | From EHS murine sarcoma basement membrane                                                                       |
| LC1                    | Diarect                 | 13700          | Forminotransferase Cyclodeaminase (liver cytosol type 1 antigen), recombinant human                             |
| LKM1                   | SurModics               | A13501         | Cytochrome P450 2D6 (CYP2D6), recombinant human                                                                 |
| LL                     | Sigma                   | L9656          | Lipoprotein lipase, from pseudomonas species                                                                    |
| Lysozyme               | The Binding Site/Arotec | ATL03-02       | From human neutrophils                                                                                          |
| M2                     | Diarect                 | 18000          | Equal mass mixture of PDC-E2, OGDC-E2 and BCOADC-E2, recombinant human                                          |
| MDA-hLDL               | Academy Bio-medical Co. | 20P-MD-L110    | Malondialdehyde modified human low density lipoprotein                                                          |
| Measles                | Meridian Life Sciences  | R14120         | Measles (Rubeola) antigen, from vero cells, Edmonston strain                                                    |
| Mi-2                   | Diarect                 | 18100          | Mi-2 $\beta$ protein, recombinant human                                                                         |
| MPO                    | ImmunoVision            | MPO-3000       | Myeloperoxidase (pANCA antigen), from human promyelocytic cell line                                             |
| MPO-Aro                | The Binding Site/Arotec | ATM01-02       | Myeloperoxidase (pANCA antigen), from human neutrophils                                                         |
| MPO-Bio                | Meridian Life Sciences  | A50181H        | Myeloperoxidase (pANCA antigen), from human neutrophils                                                         |
| Mumps                  | Meridian Life Sciences  | 8099           | BSC-1 antigen, Enders strain                                                                                    |
| Myosin                 | Sigma                   | M1636          | From rabbit muscle                                                                                              |
| NR2A                   | Sigma Genosys           | Custom         | Glutamate/N-methyl-D-aspartic acid (NMDA) receptor subunit peptide, sequence SVSYDDWDYSLARV                     |
| OGDC-E2                | SurModics               | A17801         | 2-oxo-glutarate dehydrogenase complex, recombinant human                                                        |
| Ox-LDL                 | Academy Bio-medical Co. | 20P-OX-L110    | Copper oxidized human low density lipoprotein                                                                   |
| PCNA                   | Diarect                 | 15400          | Proliferating cell nuclear antigen, recombinant human                                                           |
| PDC                    | SurModics               | A17901         | E2 component of the pyruvate dehydrogenase complex, recombinant human                                           |
| PDH                    | Sigma                   | P7032          | Pyruvate dehydrogenase, from porcine heart                                                                      |
| PG                     | Sigma                   | P5864          | Proteoglycans, from bovine nasal septum                                                                         |
| PL-12                  | Diarect                 | 15701          | Alanyl-tRNA synthetase, recombinant human                                                                       |
| PL-7                   | Diarect                 | 15601          | Theonyl-tRNA synthetase, recombinant human                                                                      |
| Pm/Scl 100             | Diarect                 | 16001          | Nucleolar protein, part of Pm/Scl complex or nuclear exosome, recombinant human                                 |
| Pm/Scl 75              | SurModics               | A17001         | Nucleolar protein, part of Pm/Scl complex or nuclear exosome, recombinant human                                 |
| PR3-Aro                | Arotec                  | ATP02-10       | Proteinase 3 antigen (cANCA antigen), from human neutrophils                                                    |
| PR3-IV                 | ImmunoVision            | PR3-3000       | Proteinase 3 antigen (cANCA antigen), from human promyelocytic cell line                                        |
| Ribo P0                | Diarect                 | 14101          | Ribosomal Phosphoprotein P0, recombinant human                                                                  |
| Ribo P1                | Diarect                 | 14200          | Ribosomal Phosphoprotein P1, recombinant human                                                                  |
| Ribo P2                | Diarect                 | 14301          | Ribosomal Phosphoprotein P2, recombinant human                                                                  |
| Ro/SS-A 52 kDa         | Diarect                 | 12701          | Ro-52 ribonucleoprotein, recombinant human                                                                      |
| Ro/SS-A 60 kDa         | Diarect                 | 17401          | Ro-60 ribonucleoprotein, recombinant human                                                                      |
| Ro/SS-A 60kDa (bovine) | Diarect                 | 15501          | Ro-60 Ribonucleoprotein, from calf thymus                                                                       |
| Rubella                | Meridian Life Sciences  | R9A123         | Rubella antigen, from Vero cells, strain HPV-77                                                                 |
| Scl-70 (trunc)         | Diarect                 | 14501          | DNA topoisomerase I truncated 70kDa processed antigenic form, recombinant human                                 |
| Scl-70 (full)          | Diarect                 | 12401          | DNA topoisomerase I full-length 100kDa form, recombinant human                                                  |
| Sm/RNP                 | ImmunoVision            | SRC-3000       | Small nuclear ribonucleoprotein complex (A, B, B', C, D, E/F, G), from calf spleen, thymus and/or rabbit thymus |
| Smith                  | ImmunoVision            | SMA-3000       | Smith antigen (small nuclear ribonucleoproteins B, B', D), from bovine spleen or thymus                         |
| SRP54                  | SurModics               | A18401         | Signal recognition particle 54, recombinant human                                                               |
| ssDNA                  | Sigma                   | D7656          | Single-stranded DNA (587-831 nt), from salmon                                                                   |
| TG                     | Diarect                 | 12201          | Thyroglobulin, from human thyroid glands                                                                        |
| Tissue tGV             | Diarect                 | 15201          | Tissue transglutaminase (tTG;BV), recombinant human                                                             |
| TPO                    | Diarect                 | 12101          | Thyropoxidase, recombinant human                                                                                |
| U-snRNP-BB'            | Diarect                 | 13301          | Small nuclear ribonucleoprotein BB', recombinant human                                                          |
| U1-snRNP-A             | Diarect                 | 13101          | Small nuclear ribonucleoprotein A, recombinant human                                                            |
| U1-snRNP-C             | Diarect                 | 13201          | Small nuclear ribonucleoprotein C, recombinant human                                                            |
| U1-snRNP68             | Diarect                 | 13001          | Small nuclear ribonucleoprotein 68 (U1-70), recombinant human                                                   |
| Vimentin               | Sigma                   | V4383          | From bovine lens                                                                                                |

**SLE array only**

**Supplementary Table 2. SLE and healthy control cohort demographic information.**

| <b>Cohort</b>          | <b>ABCoN SLE (<i>n</i> = 30)</b> | <b>ABCoN HC (<i>n</i> = 15)</b> | <b>Stanford SLE (<i>n</i> = 93)</b> | <b>Stanford HC (<i>n</i> = 50)</b> |
|------------------------|----------------------------------|---------------------------------|-------------------------------------|------------------------------------|
| <b>Age (median)</b>    | 41                               | 40                              | 36                                  | 35                                 |
| <b>Age range</b>       | 22–60                            | 32–57                           | 20–81                               | 22–67                              |
| <b>Sex (F/M)</b>       | 28/2                             | 15/0                            | 87/93                               | 28/22                              |
| <b>SLEDAI (median)</b> | 4                                | –                               | 2                                   | –                                  |
| <b>SLEDAI range</b>    | 0–16                             | –                               | 0–14                                | –                                  |
| <b>IFN signature</b>   | 15 high, 15 low                  | –                               | not assessed                        | –                                  |

Supplementary Table 3. Correlation statistics of ABCoN sample serum protein levels with BAFF reactivity.

| Protein          | ID                                              | Spearman r | p value | q value | Protein            | ID                                              | Spearman r       | p value | q value |
|------------------|-------------------------------------------------|------------|---------|---------|--------------------|-------------------------------------------------|------------------|---------|---------|
| ICAM3            | Intercellular adhesion molecule 3               | 0.718      | 0.001   | 0.035   | ACE-2              | Angiotensin I converting enzyme 2               | -0.159           | 0.364   | 0.714   |
| MIP-1 $\square$  | CCL3                                            | 0.618      | 0.001   | 0.035   | IL-5RA             | Interleukin 5 receptor, alpha                   | -0.281           | 0.383   | 0.714   |
| Lymphotoxin      | TNF $\square$ , TNF superfamily, member 1       | 0.288      | 0.001   | 0.035   | G-CSF              | Colony stimulating factor 3                     | 0.134            | 0.390   | 0.714   |
| ALCAM            | Activated leukocyte cell adhesion molecule      | 0.253      | 0.001   | 0.017   | MIP-1 $\square$    | CCL4                                            | 0.354            | 0.402   | 0.746   |
| AR               | Amphiregulin                                    | 0.274      | 0.001   | 0.017   | LIF RA             | Leukemia inhibitory factor receptor             | 0.003            | 0.405   | 0.746   |
| NT4              | Neurotrophin 4                                  | 0.411      | 0.001   | 0.017   | IL-1RA             | Interleukin 1 receptor antagonist               | 0.201            | 0.409   | 0.746   |
| TIMP1            | Tissue inhibitor of metalloproteinase 1         | 0.586      | 0.001   | 0.017   | NAP-2              | CXCL7                                           | 0.160            | 0.409   | 0.746   |
| TNF              | TNF $\square$ , TNF superfamily, member 2       | 0.197      | 0.001   | 0.017   | PDGFRA             | Platelet-derived growth factor receptor, alpha  | 0.105            | 0.418   | 0.746   |
| VEGF             | Vascular endothelial growth factor              | 0.205      | 0.001   | 0.035   | IL-9               | Interleukin 9                                   | -0.216           | 0.421   | 0.746   |
| IL-2             | Interleukin 2                                   | 0.467      | 0.002   | 0.033   | MCP4               | CCL13                                           | -0.160           | 0.425   | 0.746   |
| IL-1 $\square$   | interleukin 1, beta                             | 0.381      | 0.003   | 0.044   | FGF R3 (IIIB)      | Fibroblast growth factor receptor 3 (IIIB)      | 0.172            | 0.429   | 0.746   |
| NT3              | Neurotrophin 3                                  | 0.327      | 0.004   | 0.053   | IGFBP-2            | Insulin-like growth factor binding protein 2    | 0.137            | 0.430   | 0.746   |
| 6CKINE           | CCL21                                           | 0.347      | 0.006   | 0.062   | ST2                | Interleukin-1 receptor-like 1                   | -0.153           | 0.431   | 0.746   |
| FLT3 lig         | Fms-related tyrosine kinase 3 ligand            | 0.290      | 0.006   | 0.062   | IL-1SRII           | Interleukin 1 receptor type 2                   | 0.221            | 0.452   | 0.746   |
| IGF-II           | Insulin-like growth factor 2                    | 0.407      | 0.006   | 0.062   | B-NGF              | Nerve growth factor, beta polypeptide           | 0.138            | 0.461   | 0.746   |
| MCP-2            | CCL8                                            | 0.557      | 0.006   | 0.062   | EGF                | Epidermal growth factor                         | 0.134            | 0.464   | 0.746   |
| GDNF             | Glial cell derived neurotrophic factor          | 0.304      | 0.007   | 0.077   | Leptin             | Leptin                                          | 0.063            | 0.476   | 0.746   |
| CD27             | TNFR superfamily, member 7                      | 0.269      | 0.009   | 0.082   | IFN $\square$      | Interferon alpha                                | 0.121            | 0.483   | 0.746   |
| TNF-R1           | TNFR superfamily, member 1A                     | 0.396      | 0.009   | 0.082   | ProC               | Protein C                                       | 0.161            | 0.483   | 0.746   |
| TSH              | Thyroid stimulating hormone                     | 0.422      | 0.009   | 0.082   | ET-3               | Endothelin                                      | 0.070            | 0.490   | 0.746   |
| IL-1 $\square$   | Interleukin 1, alpha                            | 0.330      | 0.011   | 0.095   | ACE                | Angiotensin I converting enzyme 1               | 0.152            | 0.497   | 0.746   |
| GM-CSF           | Colony stimulating factor 2                     | 0.356      | 0.012   | 0.098   | HB-EGF             | Heparin-binding EGF-like growth factor          | -0.007           | 0.498   | 0.746   |
| E-selectin       | Selectin E                                      | 0.149      | 0.013   | 0.097   | HSP70              | Heat shock protein 70                           | 0.040            | 0.505   | 0.830   |
| PLGF             | Placental growth factor                         | 0.427      | 0.013   | 0.097   | ERBB1              | Epidermal growth factor receptor                | 0.100            | 0.520   | 0.830   |
| IL-5             | Interleukin 5                                   | 0.226      | 0.015   | 0.107   | FASL               | Fas ligand                                      | -0.050           | 0.528   | 0.830   |
| VE-cadherin      | Cadherin 5, type 2, VE-cadherin                 | 0.251      | 0.016   | 0.109   | BDNF               | Brain-derived neurotrophic factor               | 0.235            | 0.530   | 0.830   |
| MIP-3 $\square$  | CCL19                                           | 0.490      | 0.017   | 0.111   | IGFBP-4            | Insulin-like growth factor binding protein 4    | 0.097            | 0.536   | 0.830   |
| IL-15            | Interleukin 15                                  | 0.278      | 0.018   | 0.113   | IL-2RB             | Interleukin 2 receptor, beta                    | 0.118            | 0.576   | 0.830   |
| IL-3             | Interleukin 3                                   | 0.315      | 0.019   | 0.116   | AGRP               | Agouti related protein homolog (mouse)          | 0.023            | 0.583   | 0.830   |
| D-dimer DD6      | D-dimer, fibrin degradation product (DD6 clone) | 0.474      | 0.022   | 0.128   | TIE-2              | TEK tyrosine kinase, endothelial                | 0.128            | 0.592   | 0.830   |
| IL-8             | Interleukin 8, CXCL8                            | 0.388      | 0.025   | 0.141   | IL2RG              | Interleukin 2 receptor, gamma                   | -0.132           | 0.597   | 0.830   |
| MCSFR            | Colony stimulating factor 1 receptor            | 0.358      | 0.026   | 0.142   | FGF1               | Fibroblast growth factor 1                      | 0.027            | 0.614   | 0.871   |
| I309             | CCL1                                            | 0.214      | 0.027   | 0.142   | MCP-1              | CCL2                                            | 0.301            | 0.617   | 0.871   |
| LTBR             | TNFR superfamily, member 3                      | 0.167      | 0.036   | 0.183   | MIF                | Macrophage migration inhibitory factor          | -0.057           | 0.618   | 0.871   |
| MCSF             | Colony stimulating factor 1                     | 0.127      | 0.037   | 0.183   | FGF-4              | Fibroblast growth factor 4                      | 0.128            | 0.624   | 0.871   |
| CD141            | Thrombomodulin                                  | 0.339      | 0.039   | 0.187   | IL-16              | Interleukin 16                                  | -0.042           | 0.634   | 0.871   |
| SCF              | KIT ligand                                      | 0.172      | 0.041   | 0.191   | HGF                | Hepatocyte growth factor                        | -0.058           | 0.637   | 0.871   |
| DR6              | TNFR superfamily, member 21                     | 0.321      | 0.042   | 0.191   | CNTF               | Ciliary neurotrophic factor                     | -0.161           | 0.653   | 0.871   |
| IGFBP-1          | Insulin-like growth factor binding protein 1    | 0.476      | 0.046   | 0.203   | Follistatin        | Follistatin                                     | 0.126            | 0.659   | 0.871   |
| L-selectin       | Selectin L                                      | 0.352      | 0.048   | 0.207   | Lymphotactin       | XCL1                                            | 0.117            | 0.659   | 0.871   |
| HCC4             | CCL16                                           | 0.254      | 0.052   | 0.200   | Fractalkine        | CX3CL1                                          | 0.032            | 0.665   | 0.871   |
| IL-6             | Interleukin6                                    | 0.360      | 0.052   | 0.200   | HCC1               | RNA-binding region containing 2                 | 0.075            | 0.673   | 0.871   |
| MMP-1            | Matrix metalloproteinase 1                      | 0.263      | 0.055   | 0.200   | MCP-3              | CCL7                                            | -0.211           | 0.686   | 0.871   |
| FAS              | TNFR superfamily, member 6                      | 0.307      | 0.058   | 0.200   | GCP-2              | CXCL6                                           | 0.203            | 0.694   | 0.871   |
| IL-4             | Interleukin 4                                   | 0.130      | 0.066   | 0.221   | ERBB2              | V-erb-b2 erythroblastic leukemia homolog 2      | -0.004           | 0.699   | 0.871   |
| ITAC             | CXCL11                                          | 0.505      | 0.066   | 0.221   | UPAR               | Plasminogen activator, urokinase receptor       | -0.018           | 0.701   | 0.935   |
| MMP-2            | Matrix metalloproteinase 2                      | 0.357      | 0.070   | 0.221   | TRAIL R4           | TNFR superfamily, member 10d                    | -0.014           | 0.714   | 0.935   |
| OSM              | Oncostatin M                                    | 0.271      | 0.077   | 0.247   | VEGF R2            | Kinase insert domain receptor                   | 0.062            | 0.731   | 0.935   |
| HVEM             | TNFR superfamily, member 14                     | 0.195      | 0.084   | 0.268   | IL-12p40           | Interleukin 12B                                 | 0.112            | 0.735   | 0.935   |
| FGF-2            | Fibroblast growth factor 2                      | 0.203      | 0.088   | 0.268   | SCF R              | V-kit 4 feline sarcoma viral oncogene           | -0.007           | 0.752   | 0.935   |
| GRO-G            | CXCL3                                           | 0.332      | 0.100   | 0.294   | FGF-6              | Fibroblast growth factor 6                      | 0.037            | 0.760   | 0.935   |
| PF4              | CXCL4                                           | 0.319      | 0.105   | 0.317   | PAI-1              | Plasminogen activator inhibitor type 1          | -0.089           | 0.777   | 0.935   |
| Prolac           | Prolactin                                       | 0.267      | 0.113   | 0.335   | MMP-9              | Matrix metalloproteinase 9                      | -0.200           | 0.787   | 0.935   |
| PAHI             | Plasminogen activator inhibitor type 2          | 0.124      | 0.120   | 0.335   | IL-10RB            | Interleukin 10 receptor, beta                   | 0.067            | 0.799   | 0.935   |
| HCG              | Human chorionic gonadotropin                    | 0.153      | 0.123   | 0.357   | VEGF-D             | Vascular endothelial growth factor D            | 0.019            | 0.804   | 0.961   |
| VEGFR3           | Fms-related tyrosine kinase 4                   | 0.356      | 0.137   | 0.379   | IFN $\square$      | Interferon gamma                                | 0.000            | 0.807   | 0.961   |
| PECAM1           | Platelet/endothelial cell adhesion molecule     | 0.174      | 0.146   | 0.388   | TIMP-2             | Tissue inhibitor of metalloproteinase 2         | -0.108           | 0.810   | 0.961   |
| OPN              | Osteopontin                                     | 0.175      | 0.148   | 0.388   | IGF-IR             | Insulin-like growth factor 1 receptor           | 0.011            | 0.812   | 0.961   |
| AFP              | Alpha-fetoprotein                               | 0.159      | 0.150   | 0.388   | RANK               | TNFR superfamily, member 11a                    | 0.059            | 0.822   | 0.961   |
| IL-2SR $\square$ | Interleukin 2 receptor, alpha                   | 0.242      | 0.173   | 0.458   | PARC               | p53-associated parkin-like cytoplasmic protein  | 0.092            | 0.840   | 0.961   |
| Endo             | Endostatin, procollagen, type XVIII, alpha 1    | 0.144      | 0.191   | 0.494   | TGF $\square$ RIII | Transforming growth factor, beta receptor III   | -0.014           | 0.841   | 0.961   |
| ENA-78           | CXCL5                                           | 0.197      | 0.192   | 0.494   | SGP130             | Soluble gp130                                   | -0.020           | 0.857   | 0.961   |
| LIF              | Leukemia inhibitory factor                      | 0.194      | 0.221   | 0.618   | MMP-8              | Matrix metalloproteinase 8                      | -0.051           | 0.862   | 0.961   |
| FGF-7            | Fibroblast growth factor 7                      | 0.055      | 0.239   | 0.618   | Neut Elast         | Elastase 2, neutrophil                          | 0.006            | 0.869   | 0.961   |
| MIG              | CXCL9                                           | 0.255      | 0.244   | 0.618   | CD30               | TNFR superfamily, member 8                      | 0.047            | 0.871   | 0.961   |
| CA125            | Mucin 16                                        | 0.220      | 0.246   | 0.618   | CTACK              | CCL27                                           | 0.063            | 0.871   | 0.961   |
| MIP-1 $\square$  | CCL15                                           | 0.236      | 0.254   | 0.618   | CRP                | C-reactive protein                              | 0.036            | 0.892   | 0.961   |
| VCAM-1           | Vascular cell adhesion molecule 1               | 0.138      | 0.263   | 0.618   | BTC                | Betacellulin                                    | -0.032           | 0.893   | 0.961   |
| MMP7             | Matrix metalloproteinase 7                      | 0.167      | 0.268   | 0.618   | IL-13              | Interleukin 13                                  | -0.125           | 0.912   | 1.000   |
| MPIF-1           | CCL23                                           | -0.091     | 0.268   | 0.618   | EOT                | CCL11                                           | 0.043            | 0.919   | 1.000   |
| RANTES           | CCL5                                            | -0.226     | 0.276   | 0.618   | CNTFR $\square$    | Ciliary neurotrophic factor receptor, alpha     | 0.043            | 0.925   | 1.000   |
| EOT-3            | CCL26                                           | 0.190      | 0.277   | 0.618   | 41BB               | TNFR superfamily, member 9                      | 0.044            | 0.934   | 1.000   |
| TARC             | CCL17                                           | 0.205      | 0.280   | 0.618   | CD44V6             | CD44 antigen                                    | 0.176            | 0.949   | 1.000   |
| IL-7             | Interleukin 7                                   | 0.198      | 0.289   | 0.618   | IFN $\square$      | Interferon omega                                | 0.003            | 0.972   | 1.000   |
| BLC              | CXCL13                                          | 0.264      | 0.291   | 0.618   | PDGFR $\square$    | Platelet-derived growth factor receptor, beta   | -0.042           | 0.983   | 1.000   |
| IL-18            | Interleukin 18                                  | 0.263      | 0.292   | 0.618   | Survivin           | Baculoviral IAP repeat-containing 5             | 0.088            | 0.983   | 1.000   |
| TGF $\square$    | Transforming growth factor, alpha               | 0.217      | 0.304   | 0.714   | UPA                | Plasminogen activator, urokinase                | -0.080           | 0.983   | 1.000   |
| ICAM-1           | Intercellular adhesion molecule 1               | 0.165      | 0.315   | 0.714   | PEDF               | Pigment epithelium derived factor, member 1     | -0.027           | 0.989   | 1.000   |
| MIP-3 $\square$  | CCL20                                           | 0.144      | 0.321   | 0.714   | CD40               | TNFR superfamily member 5                       | -0.180           | 0.994   | 1.000   |
| GROB             | CXCL2                                           | 0.132      | 0.327   | 0.714   | ANG                | Angiotensin                                     | 0.0 (st dev = 0) | —       | —       |
| IL-1 SR1         | Interleukin 1 receptor type 1                   | 0.174      | 0.343   | 0.714   | D-dimer DD5        | D-dimer, fibrin degradation product (DD5 clone) | 0.0 (st dev = 0) | —       | —       |
| TRAIL R1         | TNFR superfamily, member 10a                    | 0.187      | 0.345   | 0.714   | IGFBP-3            | Insulin-like growth factor binding protein 3    | 0.0 (st dev = 0) | —       | —       |
| P-selectin       | CD62P                                           | 0.140      | 0.351   | 0.714   | IGFBP-6            | Insulin-like growth factor binding protein 6    | 0.0 (st dev = 0) | —       | —       |
| EOT2             | CCL24                                           | -0.209     | 0.352   | 0.714   | IL-17              | Interleukin17                                   | 0.0 (st dev = 0) | —       | —       |
| FGF R3 (IIIC)    | Fibroblast growth factor receptor 3 (IIIC)      | 0.140      | 0.355   | 0.714   | VAP-1              | Vascular adhesion protein 1                     | 0.0 (st dev = 0) | —       | —       |
| MMP-10           | Matrix metalloproteinase 10                     | 0.140      | 0.356   | 0.714   | —                  | —                                               | —                | —       | —       |
